# Supplementary material
Source: PubMed Central journal article supplement (PMC7572920)
Supplement: NIHMS1628089-supplement-3.pdf [file NIHMS1628089-supplement-3.pdf]

**Supplementary Table S3.** Summary of neuroimaging findings related to *SOD1* mutations

| Reference             | Modality                        | Study design    | Population                                                                     | Findings                                                                                                                                                                                                 |
|-----------------------|---------------------------------|-----------------|--------------------------------------------------------------------------------|----------------------------------------------------------------------------------------------------------------------------------------------------------------------------------------------------------|
| Müller et al. (2020)  | Diffusion MRI                   | Cross-sectional | 15 <i>SOD1</i> -ALS, 27 <i>C9orf72</i> -ALS (4 with bvFTD), 32 HC              | <i>SOD1</i> -ALS compared to HC showed no FA reductions along the corticospinal tract, frontal or prefrontal brain areas.                                                                                |
| Agosta et al. (2018)  | Structural MRI                  | Cross-sectional | 20 <i>SOD1</i> -ALS, 11 sporadic ALS, 33 HC                                    | No differences were found in cortical thickness between <i>SOD1</i> -ALS, sporadic ALS and HC. Cervical cord atrophy was greater in <i>SOD1</i> -ALS than in sporadic ALS.                               |
|                       | Diffusion MRI                   | Cross-sectional | 20 <i>SOD1</i> -ALS, 11 sporadic ALS, 33 HC                                    | Both sporadic ALS and <i>SOD1</i> -ALS showed lower FA in corticospinal tracts compared to HC, but corticospinal tract integrity was more preserved in <i>SOD1</i> -ALS compared to sporadic ALS.        |
|                       | Task-free fMRI                  | Cross-sectional | 20 <i>SOD1</i> -ALS, 11 sporadic ALS, 33 HC                                    | Sporadic ALS compared to HC showed increased connectivity within SMN, whereas <i>SOD1</i> -ALS showed similar SMN connectivity to HC.                                                                    |
| Menke et al. (2016)   | Structural MRI                  | Cross-sectional | 12 presymptomatic (10 <i>SOD1</i> , 2 <i>C9orf72</i> ), 12 sporadic ALS, 12 HC | Presymptomatic carriers compared to HC showed no differences in cortical gray matter volume, cortical thickness and subcortical gray matter structure volume.                                            |
|                       | Diffusion MRI                   | Cross-sectional | 12 presymptomatic (10 <i>SOD1</i> , 2 <i>C9orf72</i> ), 12 sporadic ALS, 12 HC | Presymptomatic carriers compared to HC showed no differences in FA and RD.                                                                                                                               |
|                       | Task-free fMRI                  | Cross-sectional | 12 presymptomatic (10 <i>SOD1</i> , 2 <i>C9orf72</i> ), 12 sporadic ALS, 12 HC | Sporadic ALS but not presymptomatic carriers showed SMN alterations compared to HC. Both groups showed increased precuneus-cingulate-middle frontal network connectivity.                                |
| Blain et al. (2011)   | Diffusion MRI                   | Cross-sectional | 7 <i>SOD1</i> -ALS, 21 sporadic ALS, 20 HC                                     | <i>SOD1</i> -ALS compared to HC showed no differences within corticospinal tracts, whereas sporadic ALS showed lower FA and RD.                                                                          |
| Carew et al. (2011a)  | <sup>1</sup> H MRS              | Cross-sectional | 4 presymptomatic <i>SOD1</i> , 29 HC, 23 patients with ALS                     | Presymptomatic <i>SOD1</i> showed reduced NAA/Cr and NAA/mI ratios in the cervical spinal cord relative to healthy controls.                                                                             |
| Vucic et al. (2010)   | Diffusion MRI                   | Cross-sectional | 7 presymptomatic <i>SOD1</i> , 7 HC                                            | No differences between presymptomatic <i>SOD1</i> and HC in FA, trace apparent diffusion coefficient, parallel diffusivity, or perpendicular diffusivity.                                                |
| Stanton et al. (2009) | Diffusion MRI                   | Cross-sectional | 6 <i>SOD1</i> -ALS, 20 sporadic ALS, 21 HC                                     | <i>SOD1</i> -ALS had higher FA than sporadic ALS in the body of the corpus callosum, corona radiata and occipitotemporal and occipitoparietal white matter.                                              |
| Ng et al. (2008)      | Diffusion MRI                   | Cross-sectional | 8 presymptomatic <i>SOD1</i> , 13 HC                                           | Presymptomatic <i>SOD1</i> compared to HC showed reduced FA, increased tensor trace, and increased RD in the posterior limb of the internal capsule.                                                     |
| Turner et al. (2007a) | Structural MRI                  | Cross-sectional | 7 <i>SOD1</i> -ALS, 23 sporadic ALS, 28 HC                                     | <i>SOD1</i> -ALS compared to HC showed pronounced grey matter loss within the anteromedial frontal lobes, while sporadic ALS showed gray matter loss confined to the medial motor and premotor cortices. |
| Turner et al. (2007b) | [ <sup>11</sup> C]WAY100635 PET | Cross-sectional | 11 <i>SOD1</i> -ALS, 21 sporadic ALS, 19 HC                                    | Sporadic and <i>SOD1</i> -ALS showed reduced [ <sup>11</sup> C]WAY100635 binding compared to HC, but the reduction was more pronounced in sporadic ALS.                                                  |

|                      |                                  |                 |                                                                            |                                                                                                                                                                                                                                                                                                                                        |
|----------------------|----------------------------------|-----------------|----------------------------------------------------------------------------|----------------------------------------------------------------------------------------------------------------------------------------------------------------------------------------------------------------------------------------------------------------------------------------------------------------------------------------|
| Turner et al. (2005) | [ <sup>11</sup> C]flumazenil PET | Cross-sectional | 2 presymptomatic <i>SOD1</i> , 10 <i>SOD1</i> -ALS, 24 sporadic ALS, 24 HC | Both sporadic and <i>SOD1</i> -ALS showed reduced [ <sup>11</sup> C]flumazenil binding compared to HC. Sporadic ALS had reduced binding in premotor regions, motor cortex, and posterior motor association areas, while <i>SOD1</i> -ALS was associated with lower binding in the left frontotemporal junction and anterior cingulate. |
|----------------------|----------------------------------|-----------------|----------------------------------------------------------------------------|----------------------------------------------------------------------------------------------------------------------------------------------------------------------------------------------------------------------------------------------------------------------------------------------------------------------------------------|

FTD, frontotemporal dementia; bvFTD, behavioral variant FTD; ALS, amyotrophic lateral sclerosis; HC, healthy control; SMN, sensorimotor network; FA, fractional anisotropy; RD, radial diffusivity; NAA, N-acetylaspartate; Cr, creatine; ml, myoinositol
